# Supplementary material
Source: Springer Nature journal article supplement (https://www.springerprofessional.de/resource/supplementary/13638_2011_204_MOESM13_ESM.pdf/11897206)

$||M-M_{||}$ 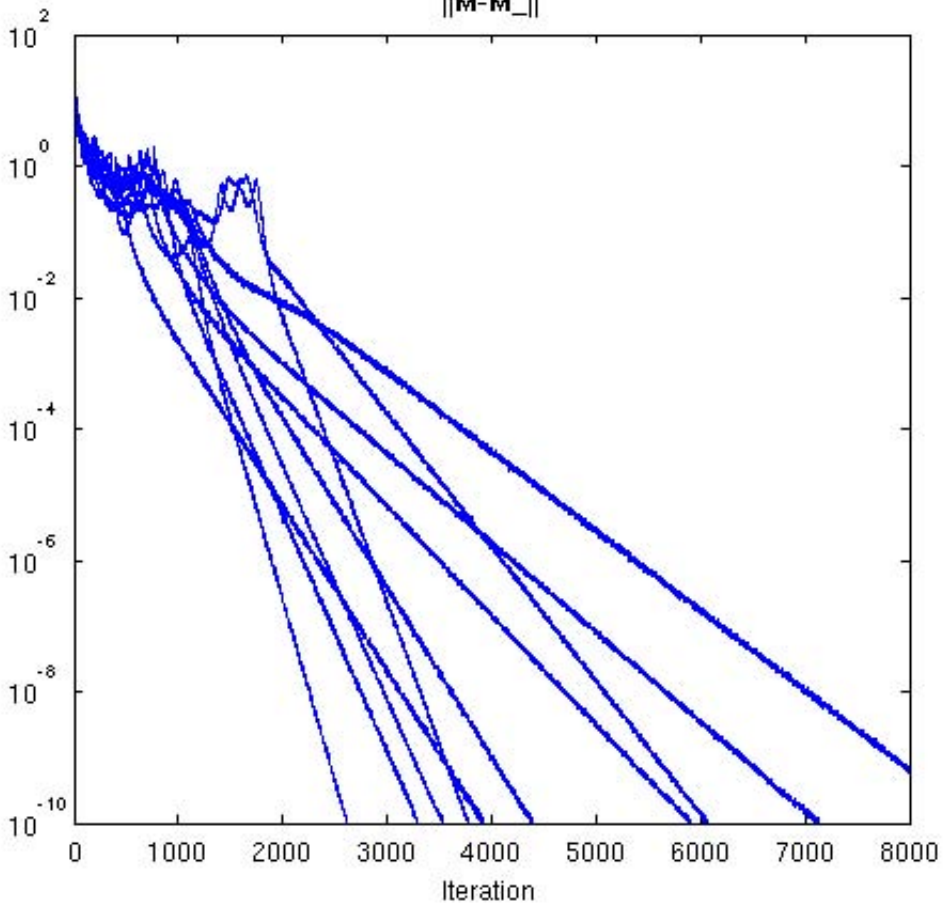

Supplement: MOESM13 [file 11897206]
